# Supplementary material for: The mechanism governing the formation of intermolecular charge transfer bands: a series of polyoxomolybdates as a case study
Source: Royal Society of Chemistry journal article supplement (doi:10.1039/d4dt00108g), 2024-01-01
Supplement: d4dt00108g1.pdf [file d4dt00108g1.pdf]

## Supplementary Information

### The Formation Reason of Intermolecular Charge Transfer bands: A series of Polyoxomolybdates as a Case Study

Xiao-Yue Zhang, Jin-Ai Fan, Zhe-Hong Chen, Cai Sun\* and Shou-Tian Zheng\*

*Fujian Provincial Key Laboratory of Advanced Inorganic Oxygenated Materials, College of Chemistry, Fuzhou University, Fuzhou, Fujian 350108, China*

E-mails: [csun@fzu.edu.cn](mailto:csun@fzu.edu.cn) (C. Sun); [stzheng@fzu.edu.cn](mailto:stzheng@fzu.edu.cn) (S.-T. Zheng)

#### Index

|                                                                                                                                                                                                              |    |
|--------------------------------------------------------------------------------------------------------------------------------------------------------------------------------------------------------------|----|
| Experimental section.....                                                                                                                                                                                    | 2  |
| Supplementary Tables.....                                                                                                                                                                                    | 3  |
| Table S1. List of main excited states for <b>2</b> . ....                                                                                                                                                    | 3  |
| Table S2. List of main excited states for <b>3</b> . ....                                                                                                                                                    | 3  |
| Supplementary Figures. ....                                                                                                                                                                                  | 4  |
| Fig. S1. PXRD patterns of <b>1</b> , <b>2</b> , and <b>3</b> . ....                                                                                                                                          | 4  |
| Fig. S2. UV-Vis absorption spectra of opda (a), mpda (b), and ppda (c) aq. ( $10^{-4}$ M). ....                                                                                                              | 5  |
| Fig. S3. UV-Vis absorption spectra of Hopda <sup>+</sup> (a), H <sub>2</sub> opda <sup>2+</sup> (b), and compare opda, Hopda <sup>+</sup> and H <sub>2</sub> opda <sup>2+</sup> (c) aq. ( $10^{-4}$ M). .... | 6  |
| Fig. S4. Shortest distance between aniline and Mo <sub>8</sub> , <b>1</b> (a), <b>2</b> (b), and <b>3</b> (c).....                                                                                           | 7  |
| Fig. S5. Structure (a) of <b>1</b> , HOMO, LUMO +1 (b) and CDD (c) map for excited state S <sub>0</sub> -S <sub>2</sub> of <b>1</b> . ...                                                                    | 8  |
| Fig. S6. Structure (a) of <b>2</b> , HOMO, LUMO +3 (b) and CDD (c) map for excited state S <sub>0</sub> -S <sub>12</sub> of <b>2</b> . ...                                                                   | 9  |
| Fig. S7. Structure (a) of <b>3</b> , HOMO, LUMO (b) and CDD (c) map for excited state S <sub>0</sub> -S <sub>1</sub> of <b>3</b> . ....                                                                      | 10 |
| Fig. S8. Hole (a) and electron (b) map for excited state S <sub>0</sub> -S <sub>2</sub> of <b>1</b> .....                                                                                                    | 11 |
| Fig. S9. Hole (a) and electron (b) map for excited state S <sub>0</sub> -S <sub>12</sub> of <b>2</b> . ....                                                                                                  | 11 |
| Fig. S10. Hole (a) and electron (b) map for excited state S <sub>0</sub> -S <sub>1</sub> of <b>3</b> .....                                                                                                   | 11 |
| Appendix.....                                                                                                                                                                                                | 12 |
| References .....                                                                                                                                                                                             | 13 |

## Experimental section

**Materials.** Other chemicals were used as purchased without further purification. Water was deionized and distilled before use.

**Measurements.** Powder X-ray diffraction (PXRD) patterns were recorded on a Rigaku DMAX 2500 diffractometer with CuK $\alpha$  radiation ( $\lambda = 1.54056 \text{ \AA}$ ). Simulated PXRD pattern was derived from the Mercury Version 4.3.0 software using the X-ray single crystal diffraction data. UV-vis spectra were performed on a SHIMADZU UV-2600 UV-visible spectrophotometer by using the BaSO $_4$ , and water as the blank, for solid and liquid sample, respectively.

### **Synthesis of (Hopda) $_4$ [ $\beta$ -Mo $_8$ O $_{26}$ ] $\cdot$ 2H $_2$ O (**1**, opda = o-phenylenediamine).**

(NH $_4$ ) $_6$ Mo $_7$ O $_{24}$  $\cdot$ 4H $_2$ O (617.5 mg, 0.5 mmol) and opda (162 mg, 1.5 mmol) in 20 mL water were stirred at room temperature. The pH was adjusted to 2.3-2.5 with 20% HCl solution. and the orange-red powder will soon be obtained. The powder was washed with H $_2$ O, EtOH, and Et $_2$ O. The yield of **1** based on the tetraethylammonium was 81%.

### **Synthesis of (H $_2$ mpda) $_2$ [ $\beta$ -Mo $_8$ O $_{26}$ ] $\cdot$ 4H $_2$ O (**2**, mpda = m-phenylenediamine).**

(NH $_4$ ) $_6$ Mo $_7$ O $_{24}$  $\cdot$ 4H $_2$ O (617.5 mg, 0.5 mmol) and mpda (162 mg, 1.5 mmol) in 80 mL water were stirred at room temperature. The pH was adjusted to 2.3-2.5 with 20% HCl solution. and the white powder will soon be obtained. The powder was washed with H $_2$ O, EtOH, and Et $_2$ O. The yield of **2** based on the tetraethylammonium was 75%.

### **Synthesis of (H $_2$ ppda) $_2$ [ $\beta$ -Mo $_8$ O $_{26}$ ] $\cdot$ 6H $_2$ O (**3**, ppda = p-phenylenediamine).**

(NH $_4$ ) $_6$ Mo $_7$ O $_{24}$  $\cdot$ 4H $_2$ O (617.5 mg, 0.5 mmol) and ppda (162 mg, 1.5 mmol) in 20 mL water were stirred at room temperature. The pH was adjusted to 2.3-2.5 with 20% HCl solution. and the white powder will soon be obtained. The powder was washed with H $_2$ O, EtOH, and Et $_2$ O. The yield of **2** based on the tetraethylammonium was 82%.

### **Computational approaches**

The structures of **1-3** were obtained from CCDC database. The crystal structure of POMo **1-3** were applied to build calculation models. Because the positions of H atoms are difficult to be accurately determined by the method of single crystal X-ray diffraction, the geometry optimizations of **1-3**, where the position of H atoms were optimized and other atoms were freezing, were performed with PBE/6-31g\* level in the CP2K software.<sup>1</sup>

The absorption spectra have been simulated by using the CP2K software at PBE function with basis set and pseudopotential being DZVP-MOLOPT-SR-GTH. Only  $\Gamma$  point has been considered for Brillouin zone sampling in the reciprocal space. The hole-electron analysis were derived using the Multiwfn software.<sup>2</sup> The hole-electron excitation properties of excited states are described by  $S_r$ :

$$S_r(r) = \sqrt{\rho^{hole}(r)\rho^{ele}(r)}$$

where  $\rho$  is the hole or electron density, and  $S_r$  (with value range of [0, 1]) is the overlap function between hole and electron distribution.

The Frontier molecular orbital for Hopda $^+$ , Hopda $^{2+}$ , H $_2$ mpda $^{2+}$  and H $_2$ ppda $^{2+}$  were done in Gaussian 09 D01 version<sup>3</sup> at B3LYP/def2-TZVP level.

## Supplementary Tables.

**Table S1.** List of main excited states for **2**.

| Excited state                   | Wavelength (nm) | Oscillator strength | Electronic transition (%)                       | Assignment                          |
|---------------------------------|-----------------|---------------------|-------------------------------------------------|-------------------------------------|
| S <sub>0</sub> -S <sub>12</sub> | 415.32          | 0.00782             | HOMO→LUMO+3 (85.6%),<br>HOMO-4→LUMO (12.1%)     | H <sub>2</sub> mpda→Mo <sub>8</sub> |
| S <sub>0</sub> -S <sub>77</sub> | 363.47          | 0.02069             | HOMO-11→LUMO+1 (67.9%),<br>HOMO-10→LUMO (24.5%) | Mo <sub>8</sub>                     |

**Table S2.** List of main excited states for **3**.

| Excited state                    | Wavelength (nm) | Oscillator strength | Electronic transition (%) | Assignment                          |
|----------------------------------|-----------------|---------------------|---------------------------|-------------------------------------|
| S <sub>0</sub> -S <sub>1</sub>   | 419.75          | 0.00256             | HOMO→LUMO+1 (99.1%)       |                                     |
| S <sub>0</sub> -S <sub>43</sub>  | 374.97          | 0.01161             | HOMO-2→LUMO+4 (91.8%)     | H <sub>2</sub> ppda→Mo <sub>8</sub> |
| S <sub>0</sub> -S <sub>164</sub> | 344.14          | 0.02717             | HOMO-3→LUMO+18 (99.2%)    |                                     |

## Supplementary Figures.

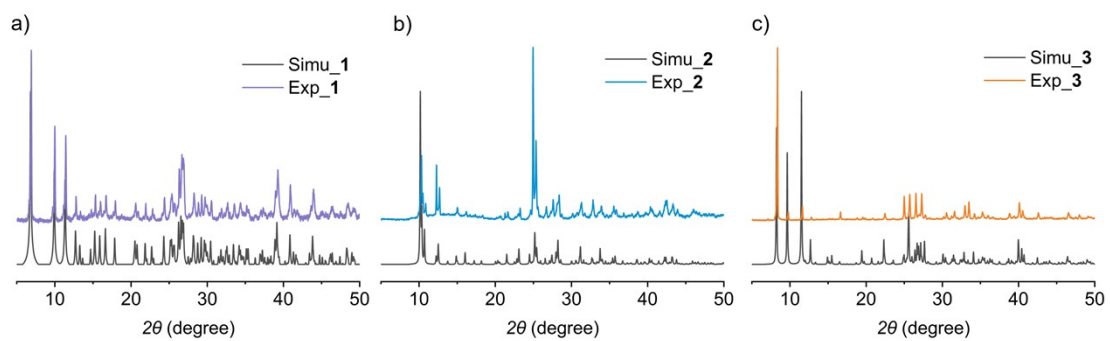

**Fig. S1.** PXR D patterns of **1**, **2**, and **3**. Experimental (Exp) and simulated (Simu) PXR D patterns of **1**, **2**, and **3**.



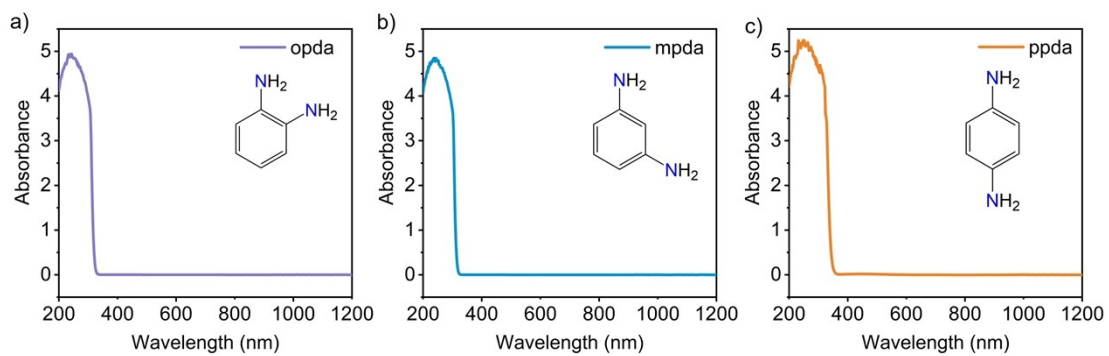

**Fig. S2.** UV-Vis absorption spectra of opda (a), mpda (b), and ppda (c) aq. ( $10^{-4}$  M). Aqueous solutions of opda, mpda and ppda were prepared separately and diluted to  $10^{-4}$  mol/L. The tests were performed using water as a reference, subtract the solvent background. The test range was 200-1200 nm.

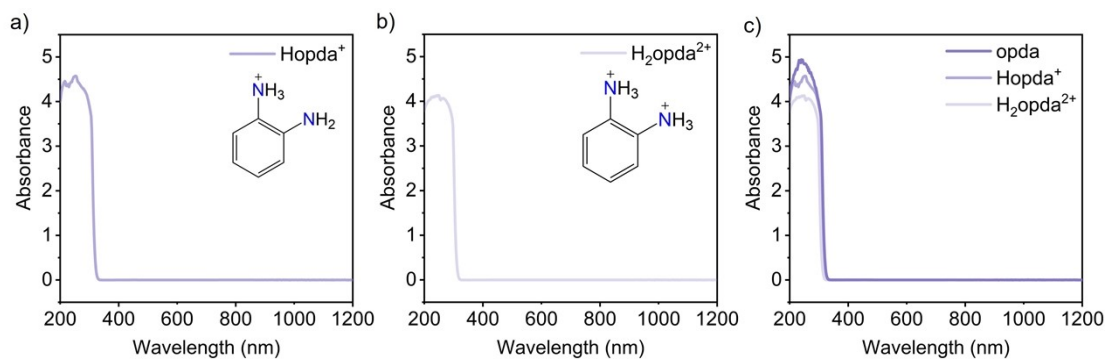

**Fig. S3.** UV-Vis absorption spectra of Hopda<sup>+</sup> (a), H<sub>2</sub>opda<sup>2+</sup> (b), and compare opda, Hopda<sup>+</sup> and H<sub>2</sub>opda<sup>2+</sup> (c) aq. (10<sup>-4</sup> M). Hopda<sup>+</sup> and H<sub>2</sub>opda<sup>2+</sup> are synthesized through the reaction of hydrochloric acid and opda in amount of substance ratios of 1:1 and 2:1, respectively.

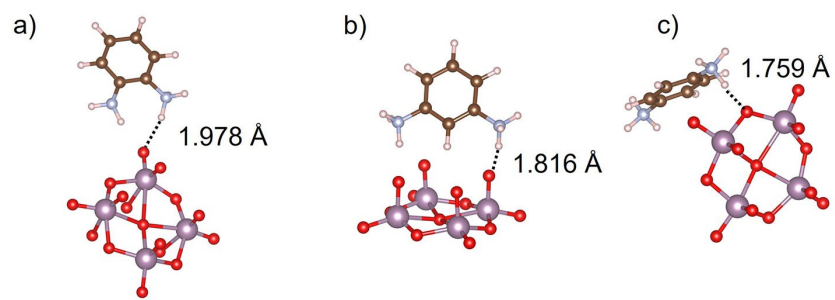

**Fig. S4.** Shortest distance between aniline and Mo<sub>8</sub>, **1** (a), **2** (b), and **3** (c).

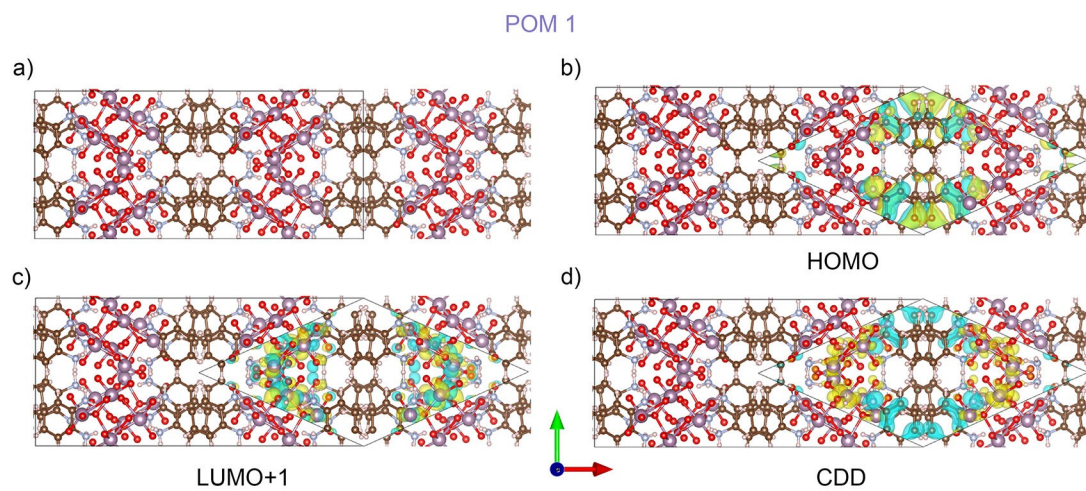

**Fig. S5.** For **1**. Structure (a), HOMO(b), LUMO +1 (c) and CDD (d) map for excited state  $S_0$ - $S_2$ .  
Crystal axis: a, red; b, green; c, blue.

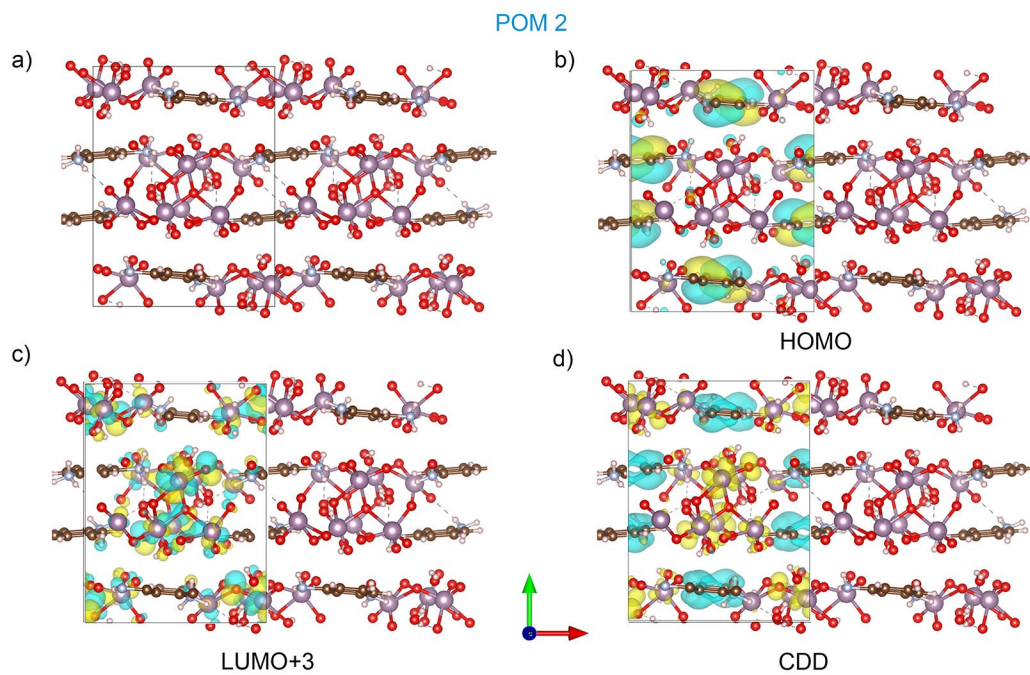

**Fig. S6.** For **2**. Structure (a), HOMO(b), LUMO +3 (c) and CDD (d) map for excited state  $S_0$ - $S_{12}$ .  
Crystal axis: a, red; b, green; c, blue.

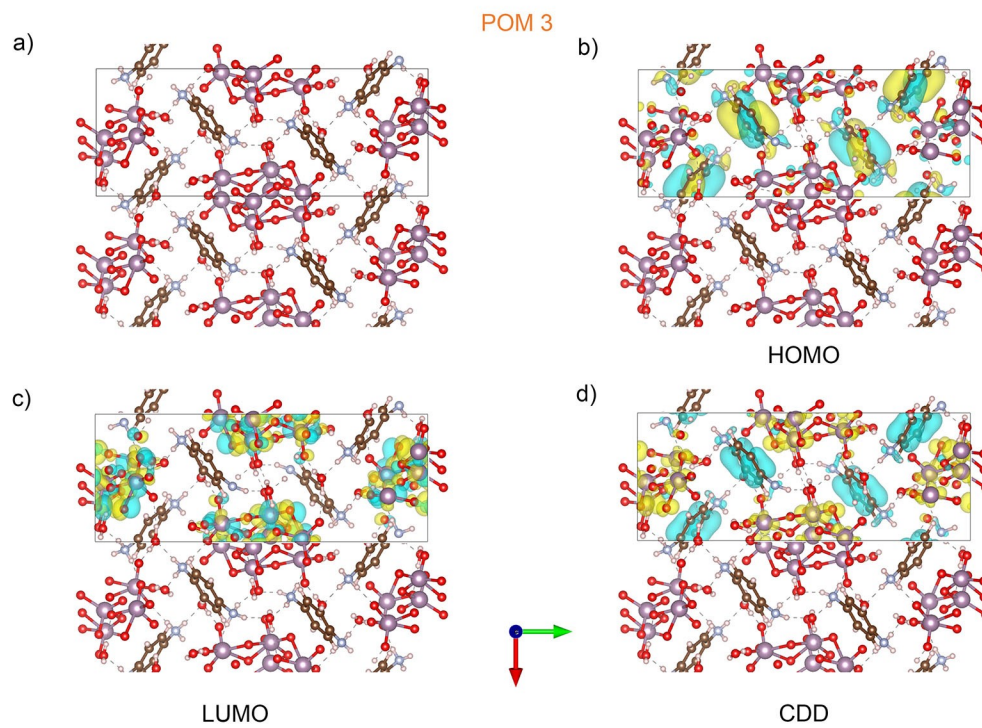

**Fig. S7.** For **3**. Structure (a), HOMO(b), LUMO (c) and CDD (d) map for excited state  $S_0$ - $S_1$  of **3**.  
Crystal axis: a, red; b, green; c, blue.



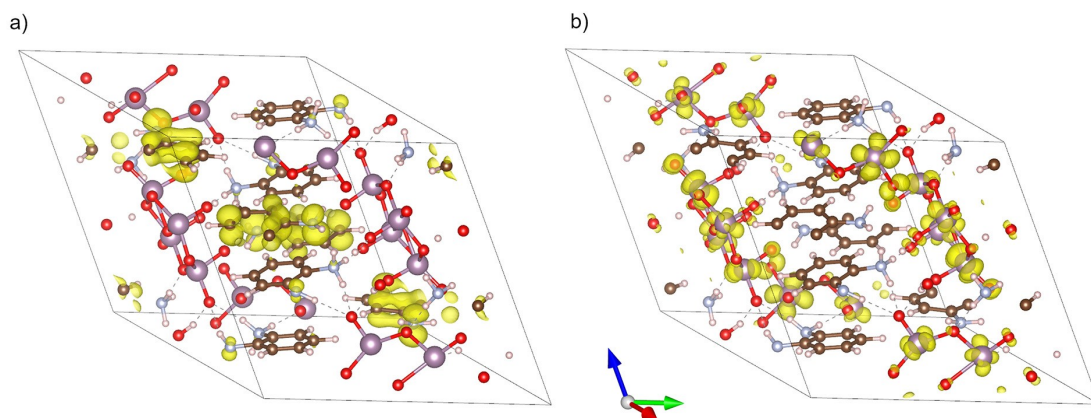

**Fig. S8.** Hole (a) and electron (b) map for excited state  $S_0-S_2$  of **1**.

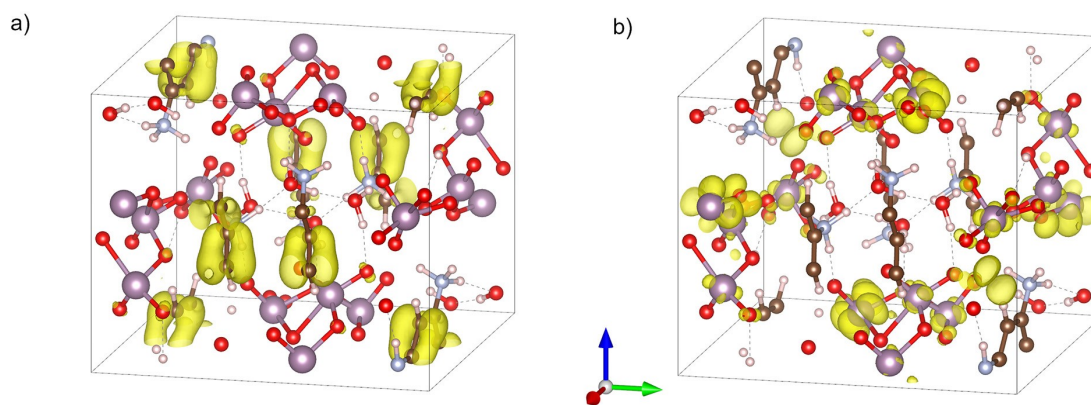

**Fig. S9.** Hole (a) and electron (b) map for excited state  $S_0-S_{12}$  of **2**.

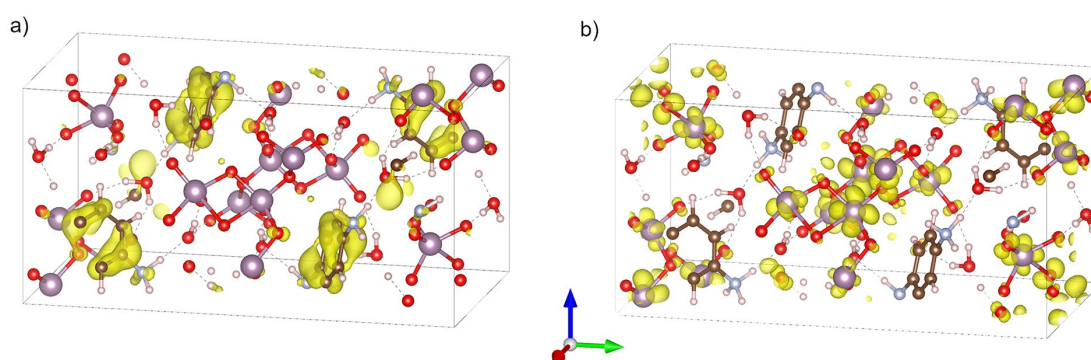

**Fig. S10.** Hole (a) and electron (b) map for excited state  $S_0-S_1$  of **3**.

## Appendix

Hole, electron and CDD map of **1**, **2** and **3**. Yellow and blue colors represent charge accumulation and depletion after electron transfer, respectively, with an iso-surface value of  $0.001 \text{ e}\cdot\text{\AA}^{-3}$ .

The excited state of POMo **1**:  $S_0-S_{109}$ ,  $S_0-S_{143}$ ,  $S_0-S_{193}$ ,  $S_0-S_{248}$ ,  $S_0-S_{451}$ ,  $S_0-S_{617}$ ,  $S_0-S_{620}$ ,  $S_0-S_{672}$ ,  $S_0-S_{759}$ ,  $S_0-S_{785}$ ,  $S_0-S_{806}$ ,  $S_0-S_{816}$ ,  $S_0-S_{821}$ ,  $S_0-S_{887}$

The excited state of POMo **2**:  $S_0-S_{77}$

The excited state of POMo **3**:  $S_0-S_{43}$   $S_0-S_{164}$



## References

- (1) Kuehne, T. D.; Iannuzzi, M.; Del Ben, M.; Rybkin, V. V.; Seewald, P.; Stein, F.; Laino, T.; Khaliullin, R. Z.; Schutt, O.; Schiffmann, F.; et al. CP2K: An electronic structure and molecular dynamics software package - Quickstep: Efficient and accurate electronic structure calculations. *J. Chem. Phys.* **2020**, *152*, 194103.
- (2) Lu, T.; Chen, F. Multiwfn: A multifunctional wavefunction analyzer. *J. Comput. Chem.* **2012**, *33*, 580-592.
- (3) Frisch, M. J.; Trucks, G. W.; Schlegel, H. B.; Scuseria, G. E.; Robb, M. A.; Cheeseman, J. R.; Scalmani, G.; Barone, V.; Petersson, G. A.; Nakatsuji, H.; Li, X.; Caricato, M.; Marenich, A.; Bloino, J.; Janesko, B. G.; Gomperts, R.; Mennucci, B.; Hratchian, H. P.; Ortiz, J. V.; Izmaylov, A. F.; Sonnenberg, J. L.; Williams-Young, D.; Ding, F.; Lipparini, F.; Egidi, F.; Goings, J.; Peng, B.; Petrone, A.; Henderson, T.; Ranasinghe, D.; Zakrzewski, V. G.; Gao, J.; Rega, N.; Zheng, G.; Liang, W.; Hada, M.; Ehara, M.; Toyota, K.; Fukuda, R.; Hasegawa, J.; Ishida, M.; Nakajima, T.; Honda, Y.; Kitao, O.; Nakai, H.; Vreven, T.; Throssell, K.; Montgomery, J. A., Jr.; Peralta, J. E.; Ogliaro, F.; Bearpark, M.; Heyd, J. J.; Brothers, E.; Kudin, K. N.; Staroverov, V. N.; Keith, T.; Kobayashi, R.; Normand, J.; Raghavachari, K.; Rendell, A.; Burant, J. C.; Iyengar, S. S.; Tomasi, J.; Cossi, M.; Millam, J. M.; Klene, M.; Adamo, C.; Cammi, R.; Ochterski, J. W.; Martin, R. L.; Morokuma, K.; Farkas, O.; Foresman, J. B.; Fox, D. J. Gaussian 09, Revision D.01; Gaussian, Inc.: Wallingford, CT, 2009.

$S_0-S_{109}$

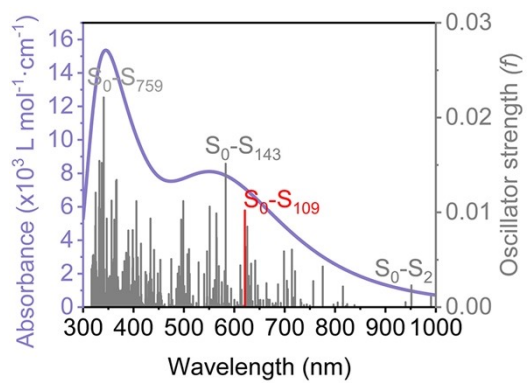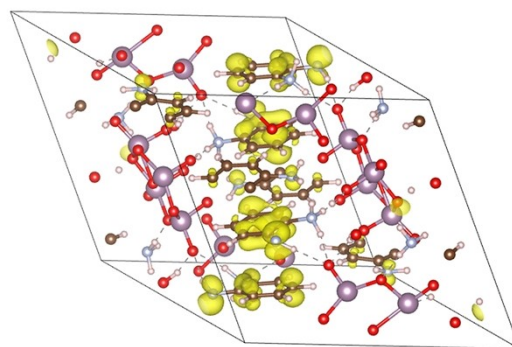

hole

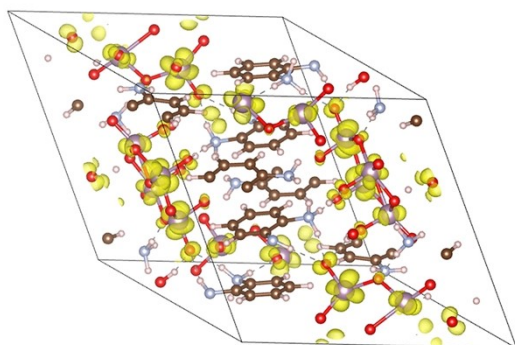

electron

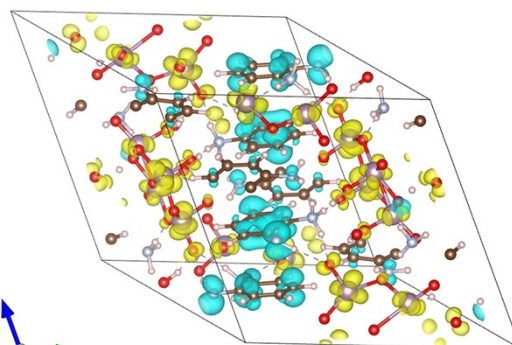

CDD

$S_0-S_{143}$

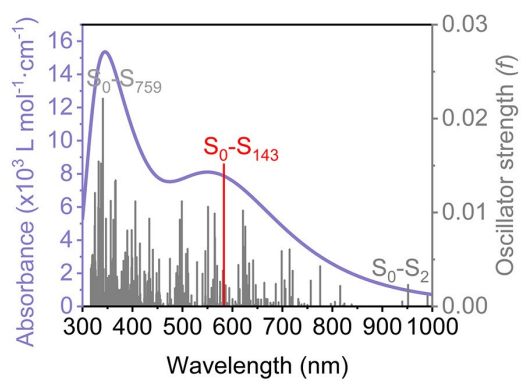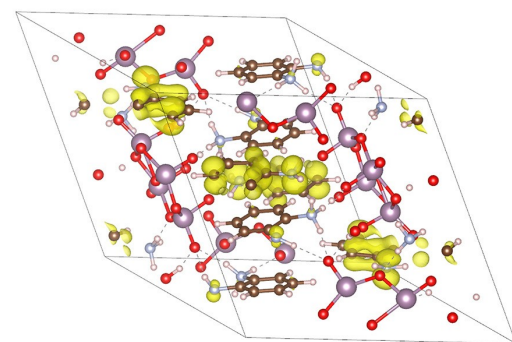

hole

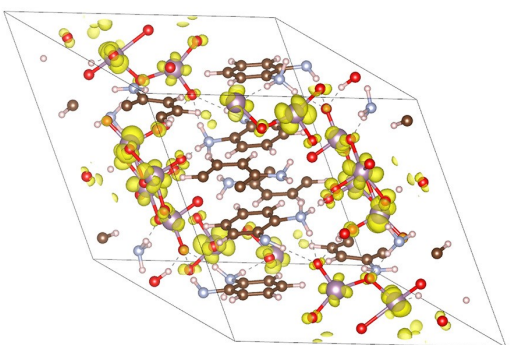

electron

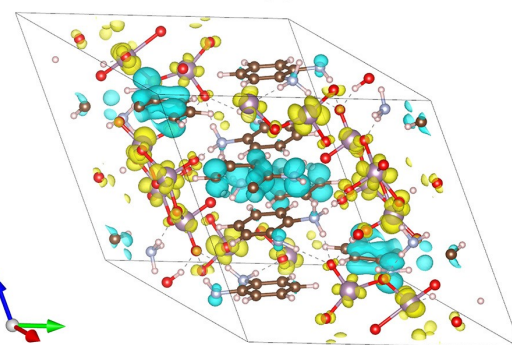

CDD

$S_0-S_{193}$

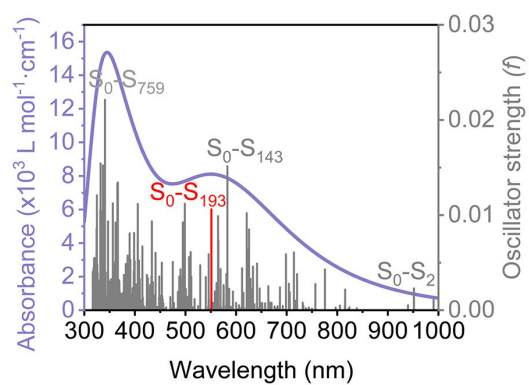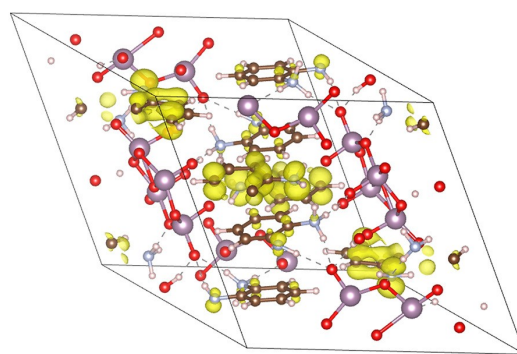

hole

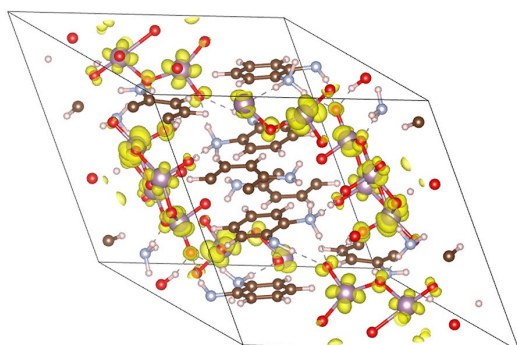

electron

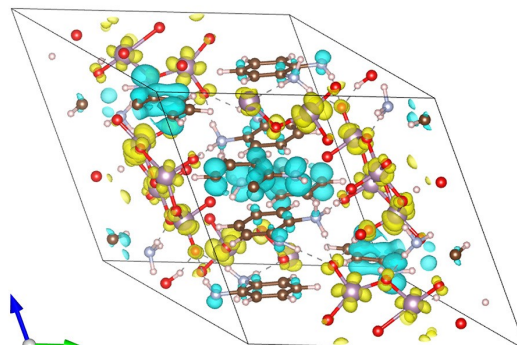

CDD

$S_0-S_{248}$

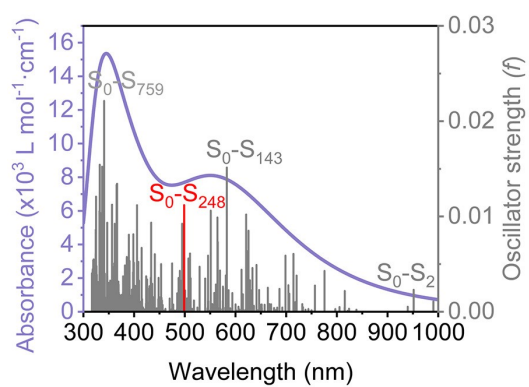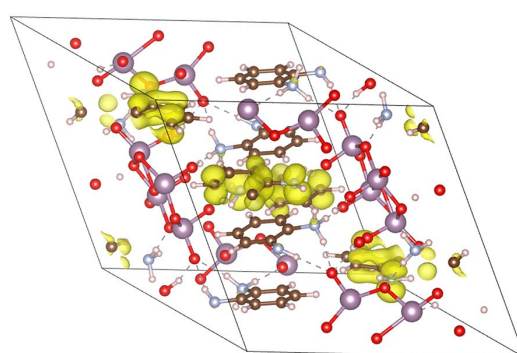

hole

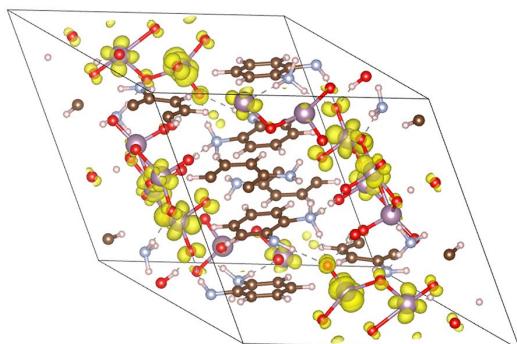

electron

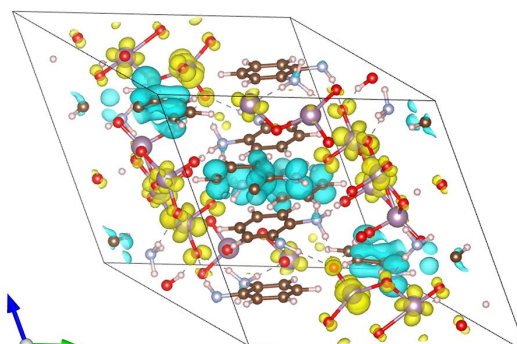

CDD



$S_0-S_{451}$

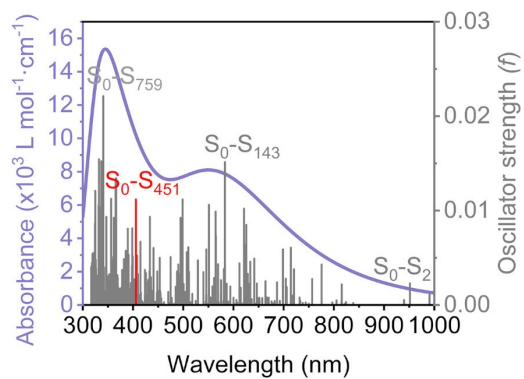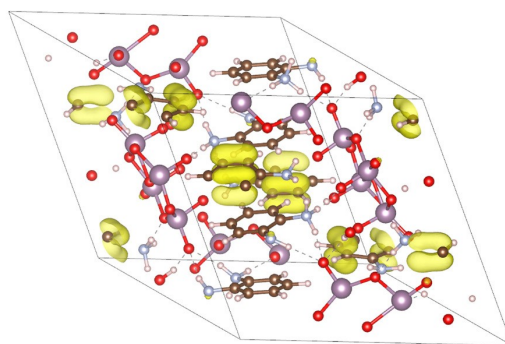

hole

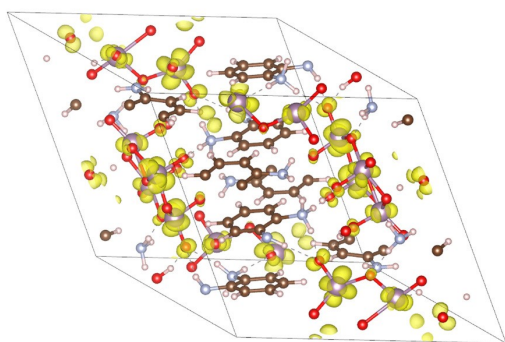

electron

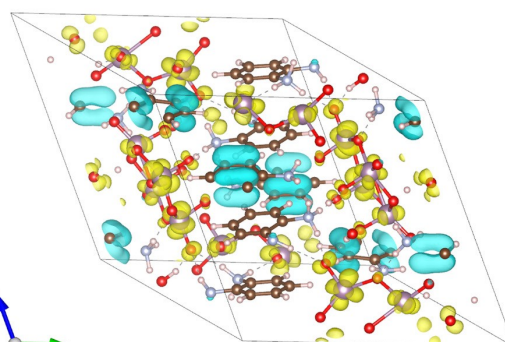

CDD

$S_0-S_{617}$

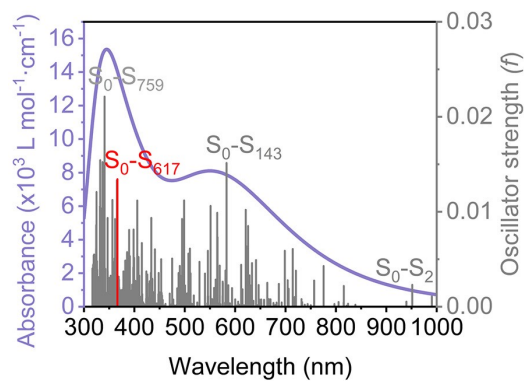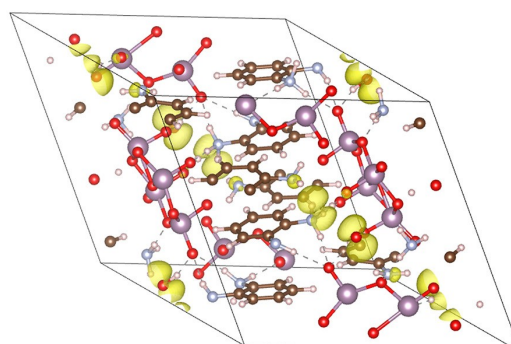

hole

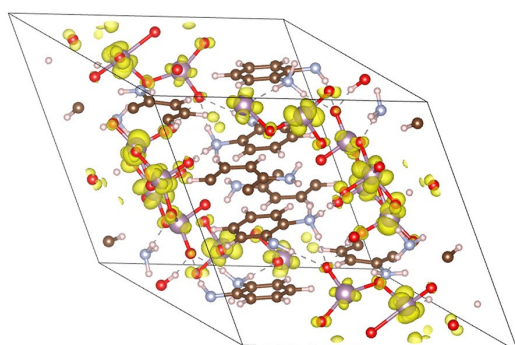

electron

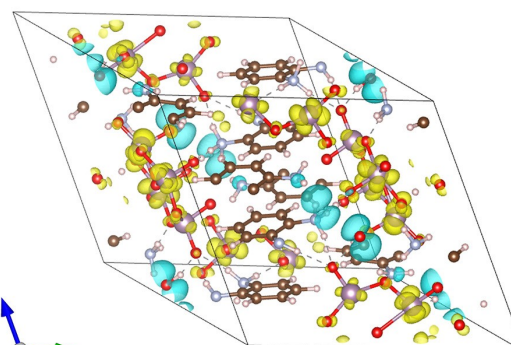

CDD

$S_0-S_{620}$

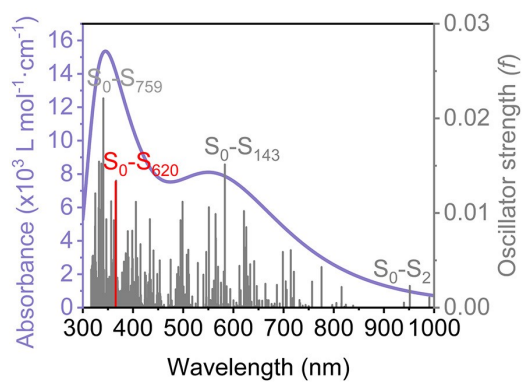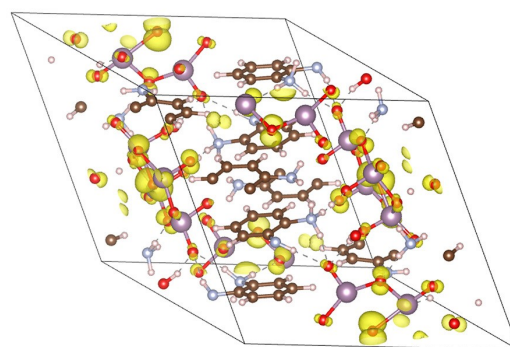

hole

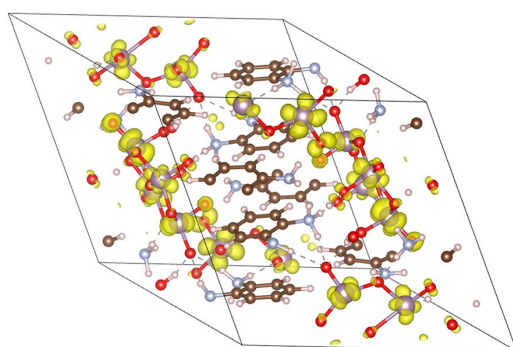

electron

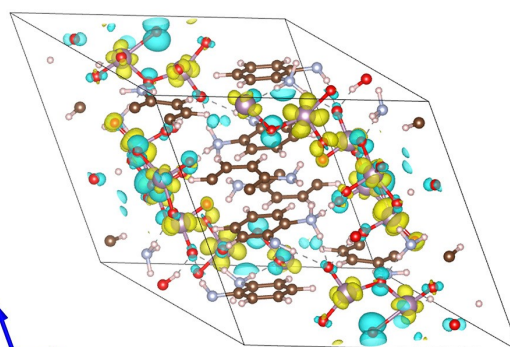

CDD

$S_0-S_{672}$

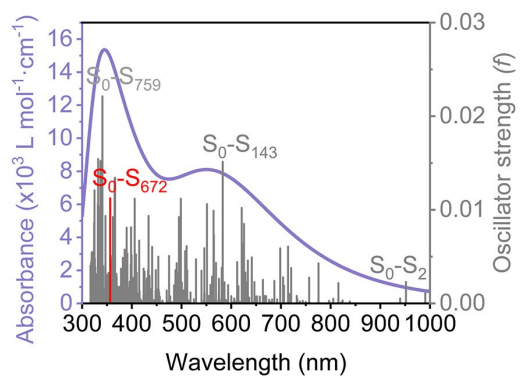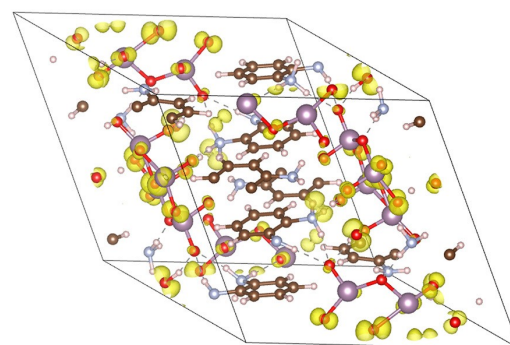

hole

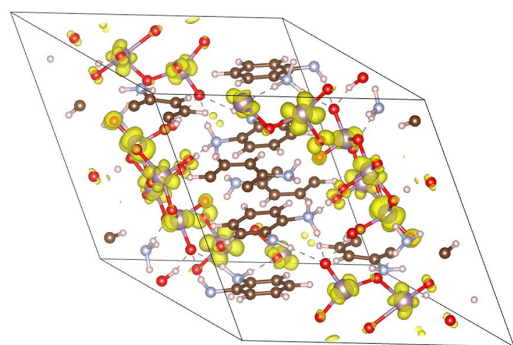

electron

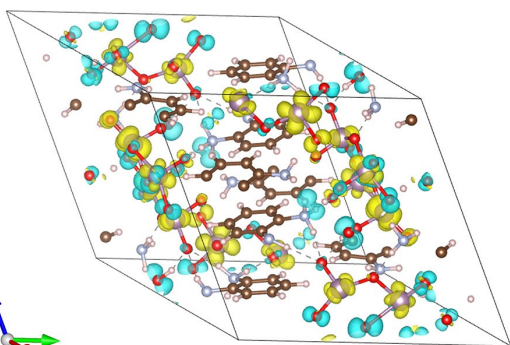

CDD

$S_0-S_{759}$

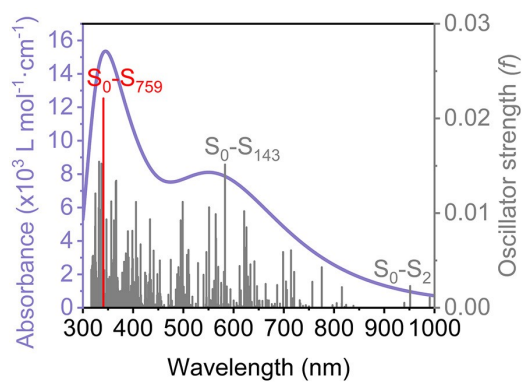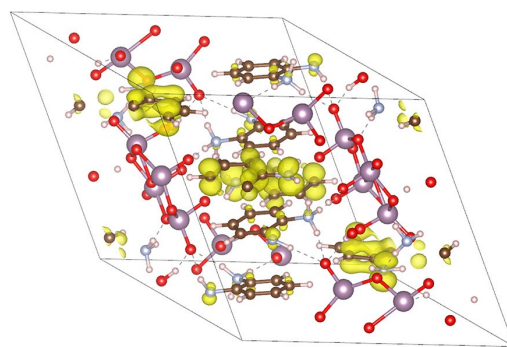

hole

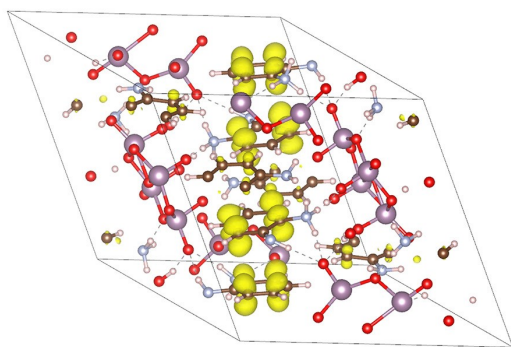

electron

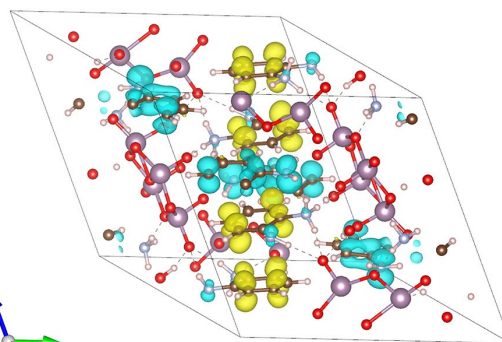

CDD

$S_0-S_{785}$

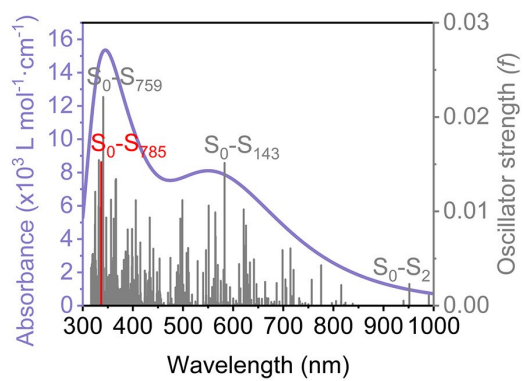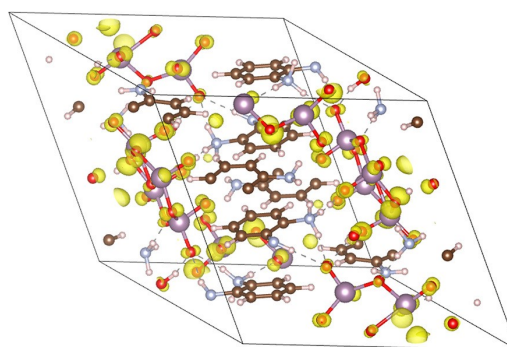

hole

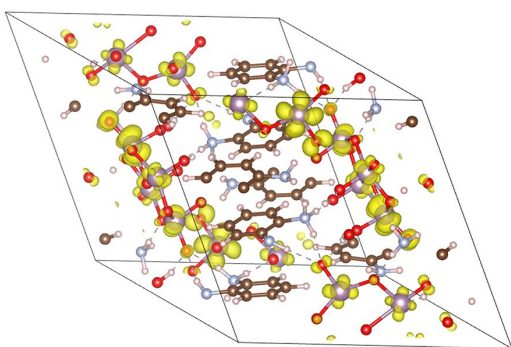

electron

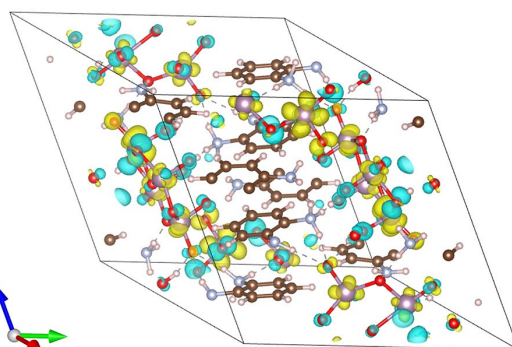

CDD



$S_0-S_{806}$

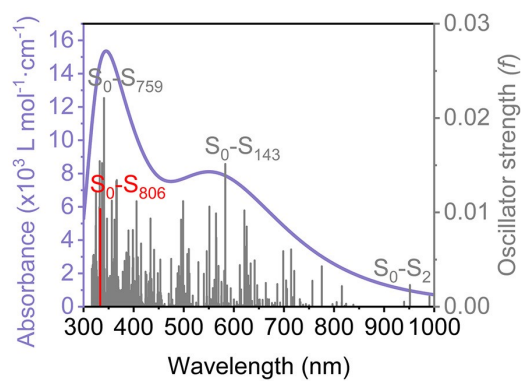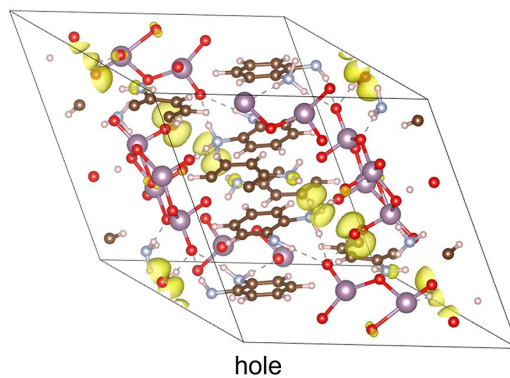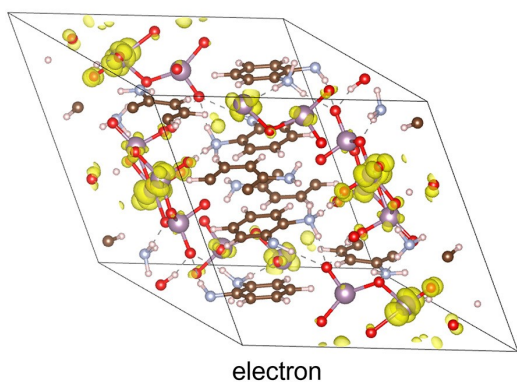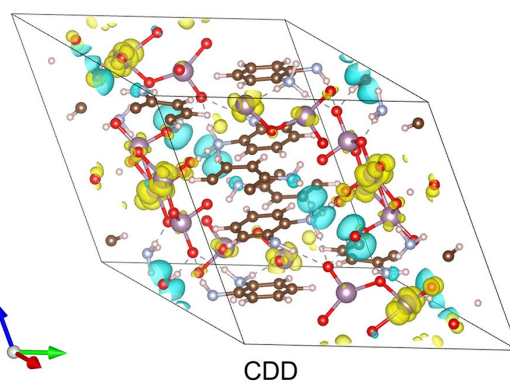

$S_0-S_{816}$

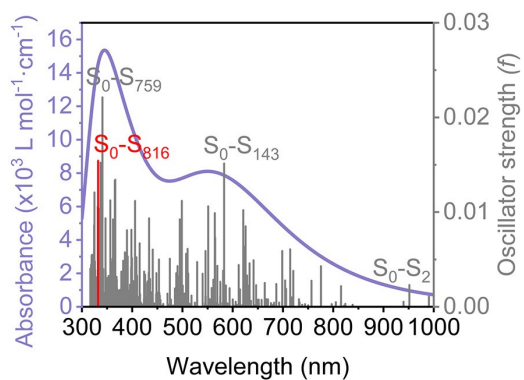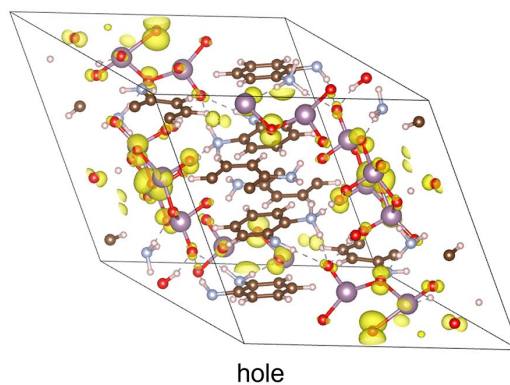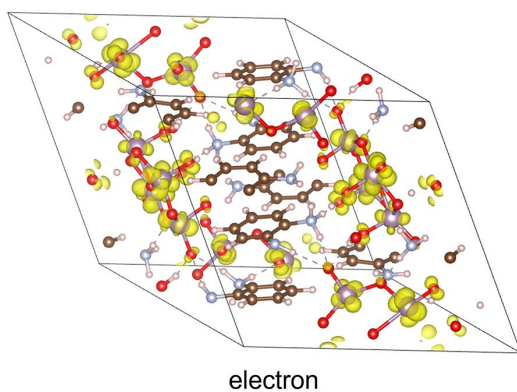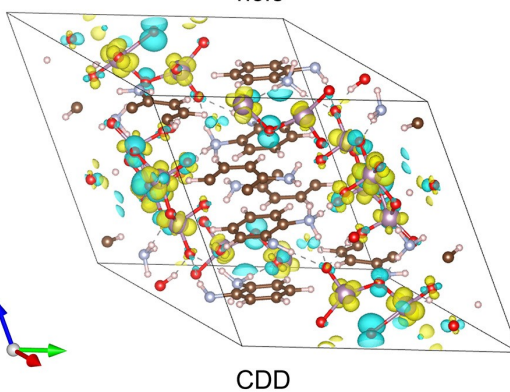

$S_0$ - $S_{821}$

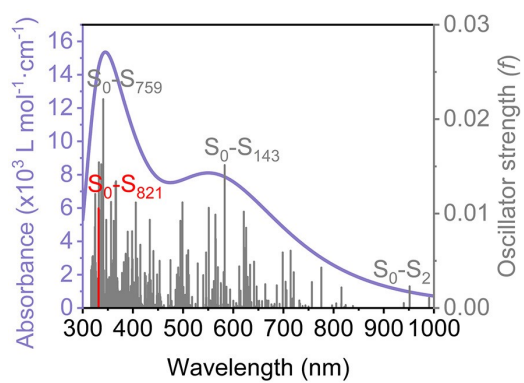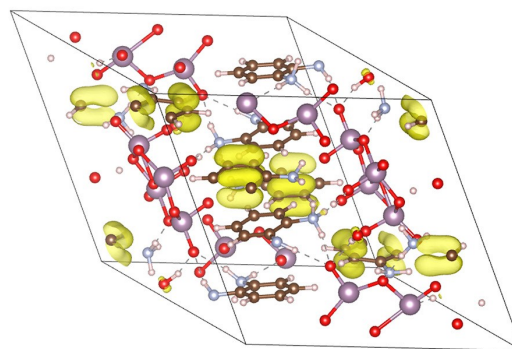

hole

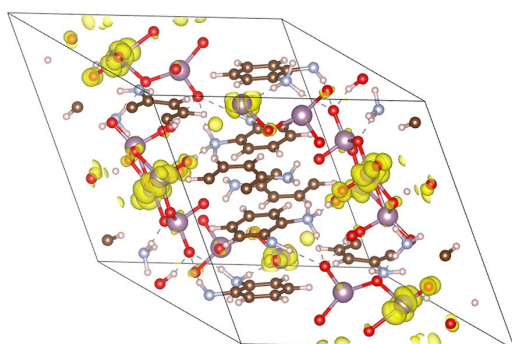

electron

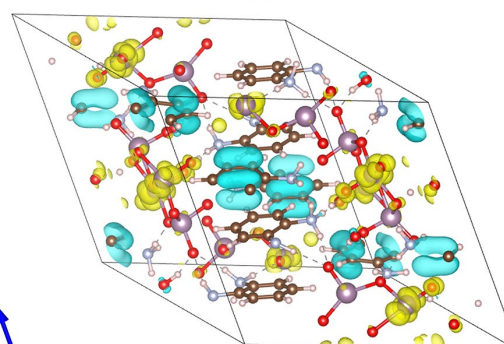

CDD

$S_0$ - $S_{887}$

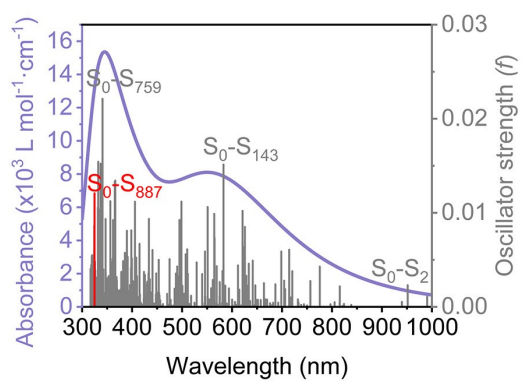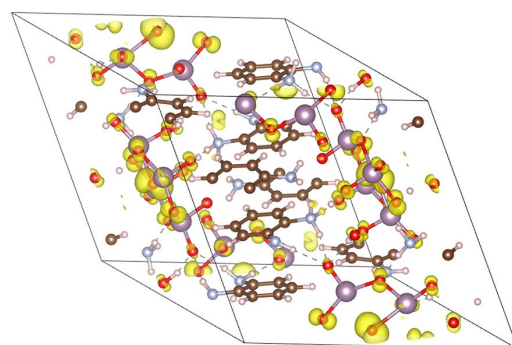

hole

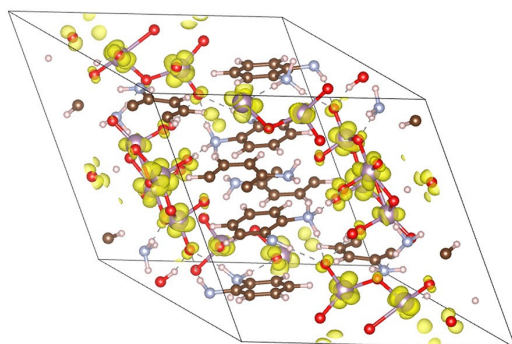

electron

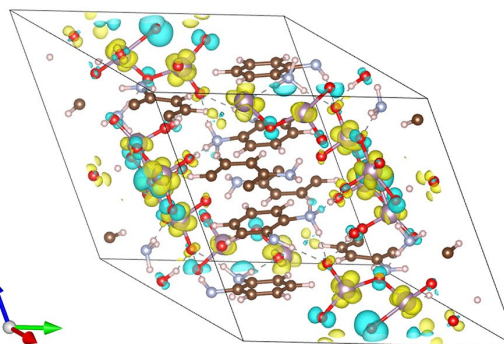

CDD



$S_0-S_{77}$

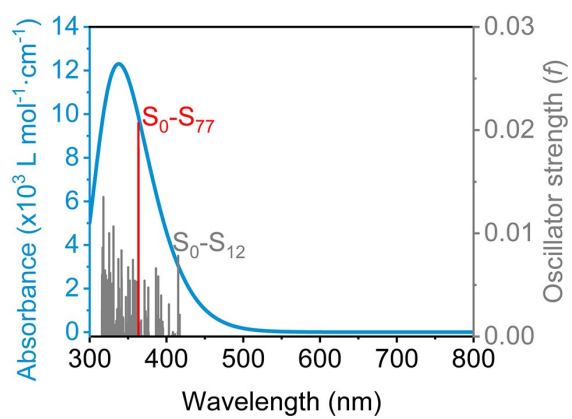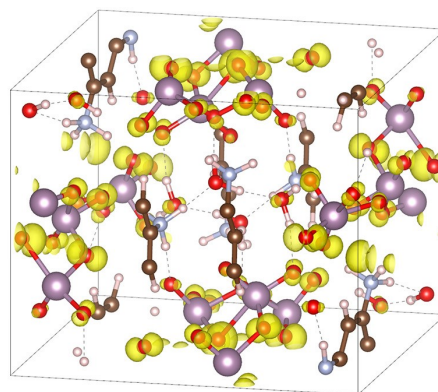

hole

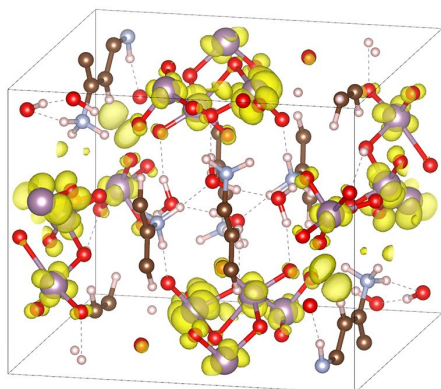

electron

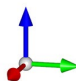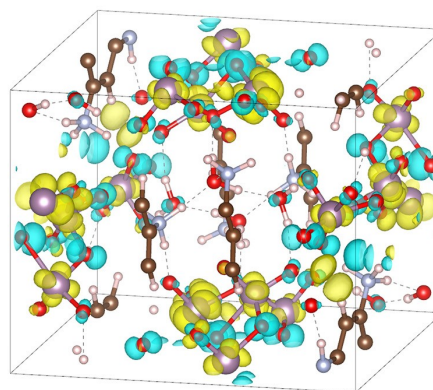

CDD

$S_0-S_{43}$

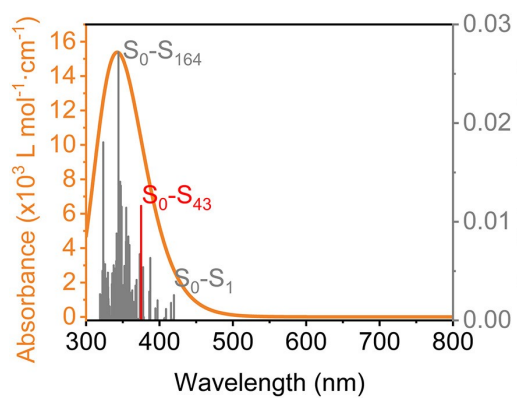

Oscillator strength ( $f$ )

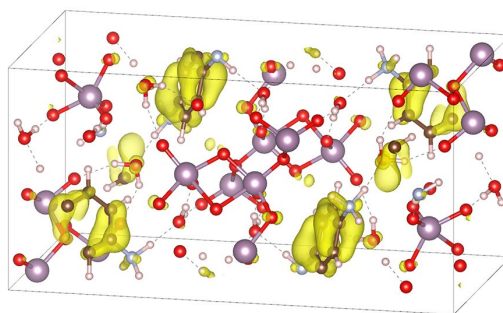

hole

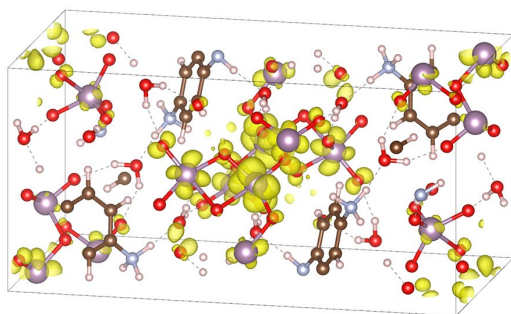

electron

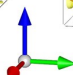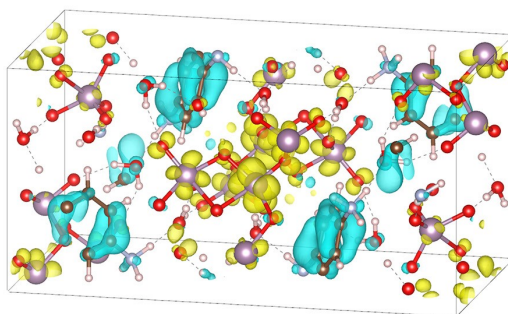

CDD

$S_0-S_{164}$

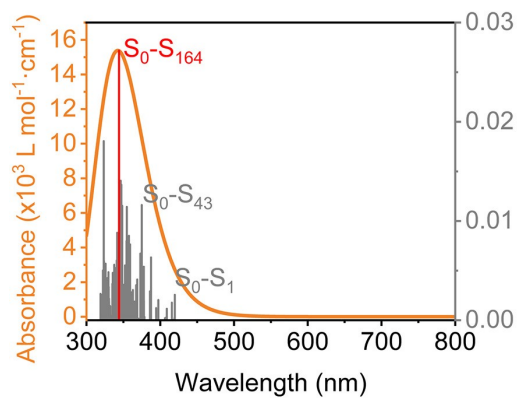

Oscillator strength ( $f$ )

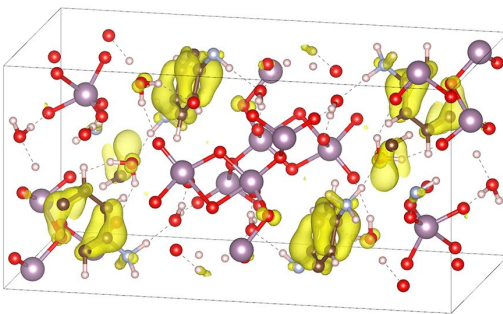

hole

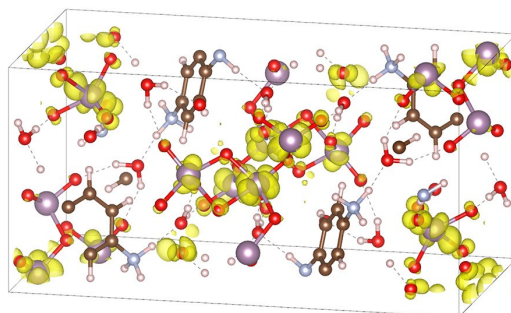

electron

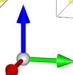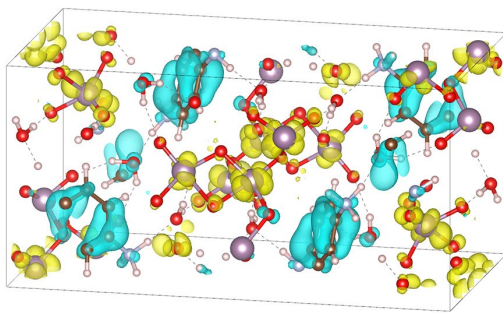

CDD
